# Supplementary material
Source: publisher figshare collection journal article supplement (https://tandf.figshare.com/ndownloader/files/22232562)
Supplement: Supplementary file 1 [file 22232562]

| **Adhesive and Cohesive Mechanisms** | - Mechanical Interlocking   - Relates to an adhesive moving not pores or around projections in the adherend surface   - Good tissue penetration improves mechanical interlocking and is influenced by the rheological properties of the adhesive   - Can be influenced through topographical modification - Molecular Bonding   - Common primary adhesive and cohesive interactions include Schiff base formation and amide bonding   - Common secondary interactions include   - π-π stacking, hydrogen bonding, dipole-dipole interactions and Van der Waals instantaneous dipoles   - Cross-linking density is a large determinant of cohesive strength - Electrostatic Bonding   - Formation of dispersion forces as a result of interactions between permanent dipoles   - Not a major contributor of adhesive strength in tissue sealants - Chain Entanglement   - Refers to a polymers ability to tangle with other polymer chains   - Increased flexibility and length of polymer chains allows for greater interpenetration and entanglement |
| --- | --- |
| **Bio-functionality** | - Mechanical and Physical Properties   - After application the adhesive should support local and organ specific cellular interactions   - The desired mechanical and physical properties should mimic local tissue - Curing Time   - Desired curing time will depend of clinical application   - Research is being undertaken into controllable polymerisation but is not used in commercially available products - Degradation Kinetics   - Can affect post-operative stability of an agent   - Rapid kinetics can lead to post-operative complications such as dehiscence |
| **Biocompatibility** | - Toxicity   - Agents should pose negligible toxicity to the host   - Toxicity of the agent, as well as metabolic products, should be assessed at a cytological, histological and systemic level - Immunogenicity   - Biomaterials should not be immunogenic   - Humoral and cytotoxic responses as well as local tissue reaction should be assessed - Gluing Process and Post-operative changes   - A mild gluing process is favoured to avoid damage to surrounding tissues   - Hydrophilic agents can expand in vivo and affect local tissue |
| **Economic** | - Tissue adhesives should be cost-effective - ICER can be a useful tool in presenting these economic analyses |
